# Supplementary material
Source: PubMed Central journal article supplement (PMC381011)
Supplement: 7600105s1.pdf [file 7600105s1.pdf]

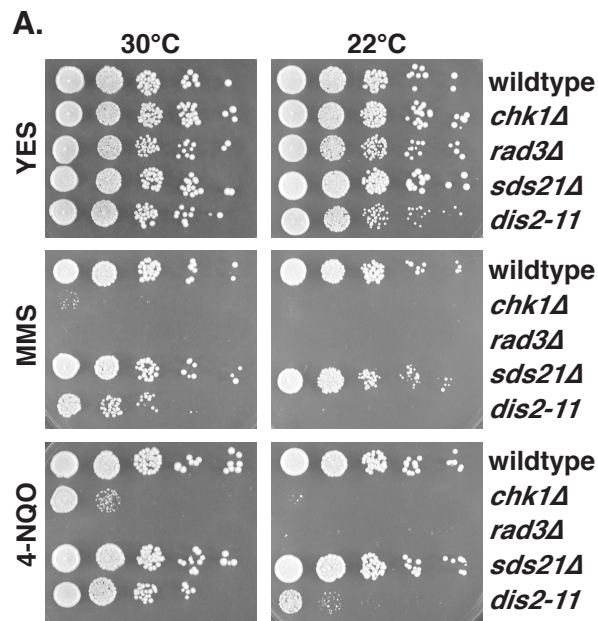

**B.**

| Strain         | -MMS      | +MMS       |
|----------------|-----------|------------|
| wildtype       | 13.9±1.5  | 18.7±2.8   |
| <i>dis2Δ</i>   | 13.4±1.1  | 30.9±4.9   |
| <i>sds21Δ</i>  | 13.8±1.2  | 19.6±3.4   |
| <i>dis2-11</i> | 14.2±1.2* | 30.8±4.3** |

\*21.0±0.8% mitosis, 12.3±0.9% cuts

\*\*0±0% mitosis, 0±0% cuts

**Supplementary Figure 1.** (A) The indicated strains were grown at 30°C, and serial dilutions were spotted onto YES agar containing no drug, 0.01% MMS or 60ng/ml 4-NQO, and incubated at 22°C or 30°C; (B) Cultures were grown at 30°C, then shifted to 20°C and incubated in the absence or presence of 0.01% MMS for 16 hours. Cells were fixed and measured for average cell length ± standard deviation (μm, n = 25)
